# Supplementary material for: Enhancing the Retention and Oxidative Stability of Volatile Flavors: A Novel Approach Utilizing O/W Pickering Emulsions Based on Agri-Food Byproducts and Spray-Drying
Source: MDPI journal article supplement (doi:10.3390/foods13091326), 2024-04-26
Supplement: s1 [file s1]

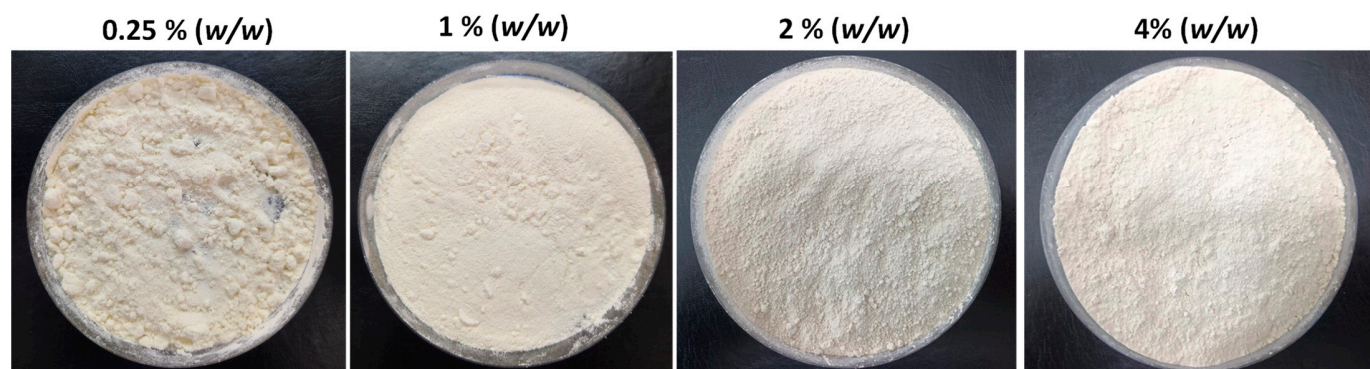

**Figure S1.** The pictures correspond to visual characteristics of spray-dried powders obtained from Pickering emulsion stabilized by lupin hull. The spray-dried powders obtained from emulsions stabilized by lupin byproducts and camelina press-cake presented the same characteristics.
